# Supplementary material for: Ternary Complexes of pDNA, Neuron-Binding Peptide, and PEGylated Polyethyleneimine for Brain Delivery with Nano-Bubbles and Ultrasound
Source: Pharmaceutics. 2021 Jul 1;13(7):1003. doi: 10.3390/pharmaceutics13071003 (PMC8309135; doi:10.3390/pharmaceutics13071003)
Supplement: Supplementary file 1 [file pharmaceutics-13-01003-s001.zip › pharmaceutics-1223383-supplementary.pdf]

# Supplementary Materials: Ternary Complexes of pDNA, Neuron-Binding Peptide, and PEGylated Polyethyleneimine for Brain Delivery with Nano-Bubbles and Ultrasound

Yoko Endo-Takahashi, Ryo Kurokawa, Kanako Sato, Nao Takizawa, Fumihiko Katagiri, Nobuhito Hamano, Ryo Suzuki, Kazuo Maruyama, Motoyoshi Nomizu, Norio Takagi and Yoichi Negishi

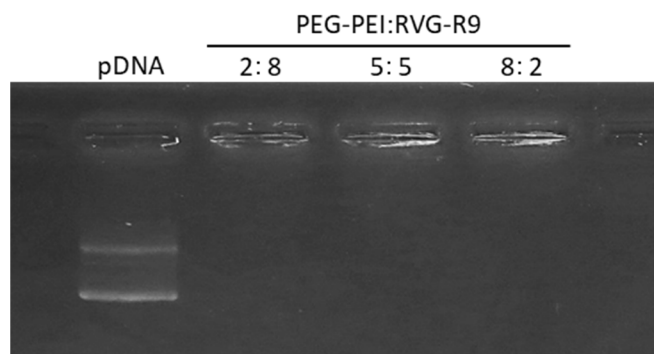

**Figure S1.** The formation of ternary complexes composed of pDNA, PEG-PEI, and RVG-R9 peptide 10. A fixed amount of pDNA was incubated with various amounts of cationic polymer and peptide (PEG-PEI:RVG-R9 = 2:8, 5:5, and 8:2). The ternary complexes were analyzed using agarose gel electrophoresis.

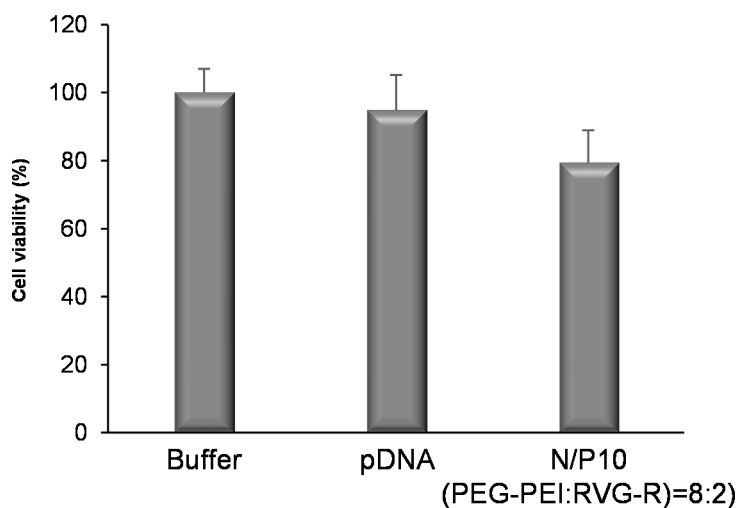

**Figure S2.** Cell viability after the transfection with the ternary complexes. Neuro 2a cells were incubated with the ternary complexes or pDNA (pDNA 1 µg/well) for 4 h. Cell viabilities were analyzed 2 days after the transfection. The bars show the mean and S.D. ( $n = 3$ ).
